# Supplementary material
Source: publisher figshare collection journal article supplement (https://acs.figshare.com/ndownloader/files/4236130)
Supplement: Supplementary file 1 [file 4236130]

 
data_wue5754 
 
_audit_creation_method            SHELXL-97 
_chemical_name_systematic 
; 
 ? 
; 
_chemical_name_common             ? 
_chemical_melting_point           ? 
_chemical_formula_moiety          ? 
_chemical_formula_sum 
 'C44 H36 Br4 Cl4 N4' 
_chemical_formula_weight          1082.21 
 
loop_ 
 _atom_type_symbol 
 _atom_type_description 
 _atom_type_scat_dispersion_real 
 _atom_type_scat_dispersion_imag 
 _atom_type_scat_source 
 'C'  'C'   0.0181   0.0091 
 'International Tables Vol C Tables 4.2.6.8 and 6.1.1.4' 
 'H'  'H'   0.0000   0.0000 
 'International Tables Vol C Tables 4.2.6.8 and 6.1.1.4' 
 'N'  'N'   0.0311   0.0180 
 'International Tables Vol C Tables 4.2.6.8 and 6.1.1.4' 
 'Br'  'Br'  -0.6763   1.2805 
 'International Tables Vol C Tables 4.2.6.8 and 6.1.1.4' 
 'Cl'  'Cl'   0.3639   0.7018 
 'International Tables Vol C Tables 4.2.6.8 and 6.1.1.4' 
 
_symmetry_cell_setting            'monoclinic' 
_symmetry_space_group_name_H-M    'P21/c' 
 
loop_ 
 _symmetry_equiv_pos_as_xyz 
 'x, y, z' 
 '-x, y+1/2, -z+1/2' 
 '-x, -y, -z' 
 'x, -y-1/2, z-1/2' 
 
_cell_length_a                    16.2030(3) 
_cell_length_b                    14.5941(4) 
_cell_length_c                    18.6700(7) 
_cell_angle_alpha                 90.00 
_cell_angle_beta                  96.606(2) 
_cell_angle_gamma                 90.00 
_cell_volume                      4385.5(2) 
_cell_formula_units_Z             4 
_cell_measurement_temperature     223(2) 
_cell_measurement_reflns_used     7603 
_cell_measurement_theta_min       0.88
_cell_measurement_theta_max       68.25 
 
_exptl_crystal_description        'plate'
_exptl_crystal_colour             'yellow' 
_exptl_crystal_size_max           0.20 
_exptl_crystal_size_mid           0.10 
_exptl_crystal_size_min           0.07 
_exptl_crystal_density_meas       ? 
_exptl_crystal_density_diffrn     1.639 
_exptl_crystal_density_method     'not measured' 
_exptl_crystal_F_000              2144 
_exptl_absorpt_coefficient_mu     7.008 
_exptl_absorpt_correction_type    'multi-scan' 
_exptl_absorpt_correction_T_min   0.3346 
_exptl_absorpt_correction_T_max   0.6397 
_exptl_absorpt_process_details    
'Denzo (Otwinowski, Borek, Majewski & Minor, 2003)' 
 
_exptl_special_details 
; 
 ? 
; 
 
_diffrn_ambient_temperature       223(2) 
_diffrn_radiation_wavelength      1.54178 
_diffrn_radiation_type            CuK\a 
_diffrn_radiation_source          'fine-focus sealed tube' 
_diffrn_radiation_monochromator   graphite 
_diffrn_measurement_device_type   'Nonius KappaCCD APEXII' 
_diffrn_measurement_method        '\w and \f scans' 
_diffrn_detector_area_resol_mean  ? 
_diffrn_standards_number          ? 
_diffrn_standards_interval_count  ? 
_diffrn_standards_interval_time   ? 
_diffrn_standards_decay_%         ? 
_diffrn_reflns_number             38833 
_diffrn_reflns_av_R_equivalents   0.043 
_diffrn_reflns_av_sigmaI/netI     0.0235 
_diffrn_reflns_limit_h_min        -19 
_diffrn_reflns_limit_h_max        19 
_diffrn_reflns_limit_k_min        -17 
_diffrn_reflns_limit_k_max        14 
_diffrn_reflns_limit_l_min        -22 
_diffrn_reflns_limit_l_max        22 
_diffrn_reflns_theta_min          4.09 
_diffrn_reflns_theta_max          67.30 
_reflns_number_total              7682 
_reflns_number_gt                 6822 
_reflns_threshold_expression      >2sigma(I) 
 
_computing_data_collection        'Collect (Nonius B.V., 1998)' 
_computing_cell_refinement        'Collect (Nonius B.V., 1998)'
_computing_data_reduction         'Denzo-SMN (Otwiniwski & Minor, 1997)'
_computing_structure_solution     'SHELXS-97 (Sheldrick, 1990)' 
_computing_structure_refinement   'SHELXL-97 (Sheldrick, 1997)' 
_computing_molecular_graphics     'XP (BrukerAXS, 2000)'
_computing_publication_material   'SHELXL-97 (Sheldrick, 1997)'
 
_refine_special_details 
; 
 Refinement of F^2^ against ALL reflections.  The weighted R-factor wR and 
 goodness of fit S are based on F^2^, conventional R-factors R are based 
 on F, with F set to Zero for negative F^2^. The threshold expression of 
 F^2^ > 2sigma(F^2^) is used only for calculating R-factors(gt) etc. and is 
 not relevant to the choice of reflections for refinement.  R-factors based 
 on F^2^ are statistically about twice as large as those based on F, and R- 
 factors based on all data will be even larger. 
; 
 
_refine_ls_structure_factor_coef  Fsqd  
_refine_ls_matrix_type            full 
_refine_ls_weighting_scheme       calc  
_refine_ls_weighting_details 
 'calc w=1/[\s^2^(Fo^2^)+(0.0383P)^2^+8.0498P] where P=(Fo^2^+2Fc^2^)/3' 
_atom_sites_solution_primary      direct 
_atom_sites_solution_secondary    difmap 
_atom_sites_solution_hydrogens    'at N from difmap, others geom' 
_refine_ls_hydrogen_treatment     mixed 
_refine_ls_extinction_method      none 
_refine_ls_extinction_coef        ? 
_refine_ls_number_reflns          7682 
_refine_ls_number_parameters      511 
_refine_ls_number_restraints      0 
_refine_ls_R_factor_all           0.0485 
_refine_ls_R_factor_gt            0.0422 
_refine_ls_wR_factor_ref          0.1027 
_refine_ls_wR_factor_gt           0.0987 
_refine_ls_goodness_of_fit_ref    1.059 
_refine_ls_restrained_S_all       1.059 
_refine_ls_shift/su_max           0.001 
_refine_ls_shift/su_mean          0.000 
 
loop_ 
 _atom_site_label 
 _atom_site_type_symbol 
 _atom_site_fract_x 
 _atom_site_fract_y 
 _atom_site_fract_z 
 _atom_site_U_iso_or_equiv 
 _atom_site_adp_type 
 _atom_site_occupancy 
 _atom_site_symmetry_multiplicity 
 _atom_site_calc_flag 
 _atom_site_refinement_flags 
 _atom_site_disorder_assembly 
 _atom_site_disorder_group 
Br1 Br 0.77926(2) 0.42366(3) 0.09279(2) 0.05482(13) Uani 1 1 d . . . 
Br2 Br 1.56841(3) 0.42153(4) 0.07096(3) 0.06623(15) Uani 1 1 d . . . 
Br3 Br 1.65398(2) 0.61325(3) 0.40923(2) 0.05653(13) Uani 1 1 d . . . 
Br4 Br 0.86933(3) 0.65392(3) 0.45794(3) 0.06201(14) Uani 1 1 d . . . 
N1 N 1.18865(16) 0.55782(19) 0.15041(14) 0.0355(6) Uani 1 1 d . . . 
C2 C 1.15991(19) 0.4763(2) 0.10927(16) 0.0329(7) Uani 1 1 d . . . 
H2 H 1.1743 0.4832 0.0594 0.040 Uiso 1 1 calc R . . 
C3 C 1.2067(2) 0.3922(2) 0.14372(16) 0.0326(7) Uani 1 1 d . . . 
H3 H 1.1807 0.3362 0.1212 0.039 Uiso 1 1 calc R . . 
N4 N 1.19631(17) 0.3908(2) 0.22008(14) 0.0352(6) Uani 1 1 d . . . 
H4 H 1.195(2) 0.442(3) 0.239(2) 0.042 Uiso 1 1 d . . . 
C5 C 1.2239(2) 0.3195(2) 0.26443(17) 0.0343(7) Uani 1 1 d . . . 
C6 C 1.2450(2) 0.3349(2) 0.33982(17) 0.0369(7) Uani 1 1 d . . . 
C7 C 1.2459(2) 0.4255(2) 0.37324(17) 0.0381(7) Uani 1 1 d . . . 
H7 H 1.2647 0.4293 0.4227 0.046 Uiso 1 1 calc R . . 
N8 N 1.22318(17) 0.49992(19) 0.34085(14) 0.0357(6) Uani 1 1 d . . . 
C9 C 1.2269(2) 0.5842(2) 0.38411(17) 0.0371(7) Uani 1 1 d . . . 
H9 H 1.2605 0.5710 0.4307 0.044 Uiso 1 1 calc R . . 
C10 C 1.2719(2) 0.6604(2) 0.34587(17) 0.0376(7) Uani 1 1 d . . . 
H10 H 1.2577 0.7198 0.3669 0.045 Uiso 1 1 calc R . . 
N11 N 1.24051(18) 0.6619(2) 0.26978(15) 0.0384(6) Uani 1 1 d . . . 
H11 H 1.225(2) 0.615(3) 0.253(2) 0.046 Uiso 1 1 d . . . 
C12 C 1.2622(2) 0.7268(2) 0.22257(18) 0.0369(7) Uani 1 1 d . . . 
C13 C 1.2469(2) 0.7113(2) 0.14718(18) 0.0378(7) Uani 1 1 d . . . 
C14 C 1.2138(2) 0.6256(2) 0.11588(18) 0.0375(7) Uani 1 1 d . . . 
H14 H 1.2108 0.6197 0.0655 0.045 Uiso 1 1 calc R . . 
C21 C 1.06602(19) 0.4655(2) 0.10610(16) 0.0335(7) Uani 1 1 d . . . 
C22 C 1.0176(2) 0.5248(3) 0.1407(2) 0.0457(8) Uani 1 1 d . . . 
H22 H 1.0429 0.5735 0.1680 0.055 Uiso 1 1 calc R . . 
C23 C 0.9318(2) 0.5137(3) 0.1359(2) 0.0504(9) Uani 1 1 d . . . 
H23 H 0.8991 0.5550 0.1591 0.060 Uiso 1 1 calc R . . 
C24 C 0.8959(2) 0.4415(3) 0.09678(19) 0.0416(8) Uani 1 1 d . . . 
C25 C 0.9424(2) 0.3815(3) 0.0612(2) 0.0486(9) Uani 1 1 d . . . 
H25 H 0.9170 0.3323 0.0346 0.058 Uiso 1 1 calc R . . 
C26 C 1.0270(2) 0.3949(3) 0.0654(2) 0.0453(8) Uani 1 1 d . . . 
H26 H 1.0591 0.3553 0.0402 0.054 Uiso 1 1 calc R . . 
C31 C 1.2968(2) 0.3946(2) 0.12892(16) 0.0326(7) Uani 1 1 d . . . 
C32 C 1.3169(2) 0.3709(3) 0.06092(18) 0.0410(8) Uani 1 1 d . . . 
H32 H 1.2747 0.3503 0.0259 0.049 Uiso 1 1 calc R . . 
C33 C 1.3969(2) 0.3770(3) 0.04360(19) 0.0470(9) Uani 1 1 d . . . 
H33 H 1.4095 0.3605 -0.0026 0.056 Uiso 1 1 calc R . . 
C34 C 1.4586(2) 0.4079(3) 0.0953(2) 0.0441(8) Uani 1 1 d . . . 
C35 C 1.4413(2) 0.4304(3) 0.1632(2) 0.0480(9) Uani 1 1 d . . . 
H35 H 1.4841 0.4500 0.1982 0.058 Uiso 1 1 calc R . . 
C36 C 1.3606(2) 0.4240(3) 0.18007(18) 0.0419(8) Uani 1 1 d . . . 
H36 H 1.3486 0.4397 0.2266 0.050 Uiso 1 1 calc R . . 
C51 C 1.2317(2) 0.2304(2) 0.23858(19) 0.0421(8) Uani 1 1 d . . . 
H51 H 1.2204 0.2191 0.1889 0.051 Uiso 1 1 calc R . . 
C52 C 1.2556(3) 0.1587(3) 0.2847(2) 0.0509(9) Uani 1 1 d . . . 
H52 H 1.2591 0.0991 0.2661 0.061 Uiso 1 1 calc R . . 
C53 C 1.2745(3) 0.1737(3) 0.3579(2) 0.0533(10) Uani 1 1 d . . . 
H53 H 1.2906 0.1248 0.3892 0.064 Uiso 1 1 calc R . . 
C54 C 1.2694(2) 0.2610(3) 0.38412(19) 0.0467(9) Uani 1 1 d . . . 
H54 H 1.2829 0.2712 0.4338 0.056 Uiso 1 1 calc R . . 
C91 C 1.1395(2) 0.6079(2) 0.40003(17) 0.0376(7) Uani 1 1 d . . . 
C92 C 1.0767(2) 0.6351(3) 0.3477(2) 0.0580(11) Uani 1 1 d . . . 
H92 H 1.0888 0.6438 0.3001 0.070 Uiso 1 1 calc R . . 
C93 C 0.9964(3) 0.6499(3) 0.3639(2) 0.0597(11) Uani 1 1 d . . . 
H93 H 0.9543 0.6679 0.3278 0.072 Uiso 1 1 calc R . . 
C94 C 0.9794(2) 0.6376(3) 0.4337(2) 0.0442(8) Uani 1 1 d . . . 
C95 C 1.0402(2) 0.6119(3) 0.4868(2) 0.0504(9) Uani 1 1 d . . . 
H95 H 1.0279 0.6043 0.5344 0.061 Uiso 1 1 calc R . . 
C96 C 1.1201(2) 0.5973(3) 0.46978(19) 0.0457(9) Uani 1 1 d . . . 
H96 H 1.1619 0.5798 0.5063 0.055 Uiso 1 1 calc R . . 
C101 C 1.3662(2) 0.6484(2) 0.35997(17) 0.0369(7) Uani 1 1 d . . . 
C102 C 1.4134(2) 0.6195(2) 0.30716(18) 0.0416(8) Uani 1 1 d . . . 
H102 H 1.3871 0.6063 0.2608 0.050 Uiso 1 1 calc R . . 
C103 C 1.4989(2) 0.6094(3) 0.32129(19) 0.0445(8) Uani 1 1 d . . . 
H103 H 1.5305 0.5903 0.2848 0.053 Uiso 1 1 calc R . . 
C104 C 1.5366(2) 0.6278(2) 0.38936(19) 0.0421(8) Uani 1 1 d . . . 
C105 C 1.4918(2) 0.6570(3) 0.4434(2) 0.0538(10) Uani 1 1 d . . . 
H105 H 1.5184 0.6696 0.4897 0.065 Uiso 1 1 calc R . . 
C106 C 1.4068(2) 0.6675(3) 0.42791(19) 0.0505(9) Uani 1 1 d . . . 
H106 H 1.3757 0.6880 0.4643 0.061 Uiso 1 1 calc R . . 
C121 C 1.2998(2) 0.8102(2) 0.2456(2) 0.0438(8) Uani 1 1 d . . . 
H121 H 1.3126 0.8216 0.2952 0.053 Uiso 1 1 calc R . . 
C122 C 1.3181(2) 0.8753(3) 0.1967(2) 0.0526(9) Uani 1 1 d . . . 
H122 H 1.3424 0.9309 0.2135 0.063 Uiso 1 1 calc R . . 
C123 C 1.3016(3) 0.8608(3) 0.1231(2) 0.0563(10) Uani 1 1 d . . . 
H123 H 1.3138 0.9061 0.0901 0.068 Uiso 1 1 calc R . . 
C124 C 1.2669(2) 0.7788(3) 0.0994(2) 0.0481(9) Uani 1 1 d . . . 
H124 H 1.2564 0.7679 0.0495 0.058 Uiso 1 1 calc R . . 
C15 C 0.5242(3) 0.7724(3) 0.1844(2) 0.0660(12) Uani 1 1 d . . . 
H15A H 0.5798 0.7563 0.2074 0.079 Uiso 1 1 calc R . . 
H15B H 0.4874 0.7774 0.2224 0.079 Uiso 1 1 calc R . . 
Cl1 Cl 0.48815(8) 0.68516(9) 0.12481(7) 0.0779(3) Uani 1 1 d . . . 
Cl2 Cl 0.52888(7) 0.87901(8) 0.14118(6) 0.0664(3) Uani 1 1 d . . . 
C16 C 1.0017(5) 0.8691(6) 0.2076(5) 0.158(4) Uani 1 1 d . . . 
H16A H 0.9570 0.9121 0.1911 0.189 Uiso 1 1 calc R . . 
H16B H 1.0022 0.8625 0.2599 0.189 Uiso 1 1 calc R . . 
Cl3 Cl 1.09326(11) 0.91623(16) 0.19115(9) 0.1188(6) Uani 1 1 d . . . 
Cl4 Cl 0.97773(12) 0.76504(12) 0.16869(9) 0.1073(5) Uani 1 1 d . . . 
 
loop_ 
 _atom_site_aniso_label 
 _atom_site_aniso_U_11 
 _atom_site_aniso_U_22 
 _atom_site_aniso_U_33 
 _atom_site_aniso_U_23 
 _atom_site_aniso_U_13 
 _atom_site_aniso_U_12 
Br1 0.0366(2) 0.0649(3) 0.0632(3) 0.0053(2) 0.00640(17) -0.00573(18) 
Br2 0.0355(2) 0.0814(3) 0.0831(3) 0.0185(3) 0.0120(2) -0.0007(2) 
Br3 0.0431(2) 0.0569(3) 0.0675(3) -0.0042(2) -0.00262(18) 0.00144(18) 
Br4 0.0429(2) 0.0720(3) 0.0735(3) 0.0194(2) 0.0171(2) 0.0074(2) 
N1 0.0355(14) 0.0355(15) 0.0345(14) 0.0013(12) 0.0002(11) -0.0019(12) 
C2 0.0371(17) 0.0346(18) 0.0267(14) 0.0006(13) 0.0020(12) -0.0008(13) 
C3 0.0383(17) 0.0333(17) 0.0258(14) -0.0016(13) 0.0015(12) 0.0001(13) 
N4 0.0434(15) 0.0327(15) 0.0297(13) 0.0004(12) 0.0056(11) 0.0019(12) 
C5 0.0354(16) 0.0342(17) 0.0338(16) 0.0029(14) 0.0057(13) -0.0007(13) 
C6 0.0398(17) 0.0370(19) 0.0337(16) 0.0029(14) 0.0036(13) -0.0013(14) 
C7 0.0437(18) 0.042(2) 0.0285(15) 0.0011(14) 0.0053(13) 0.0001(15) 
N8 0.0402(15) 0.0361(15) 0.0309(13) 0.0007(12) 0.0049(11) -0.0005(12) 
C9 0.0416(18) 0.0386(19) 0.0303(16) -0.0028(14) 0.0018(13) 0.0024(14) 
C10 0.0456(19) 0.0358(18) 0.0307(16) -0.0064(14) 0.0018(14) 0.0009(15) 
N11 0.0450(16) 0.0350(16) 0.0343(15) 0.0002(12) 0.0006(12) -0.0047(13) 
C12 0.0331(16) 0.0353(18) 0.0423(18) 0.0041(14) 0.0043(13) 0.0037(14) 
C13 0.0367(17) 0.0352(18) 0.0404(18) 0.0041(14) -0.0005(14) 0.0000(14) 
C14 0.0394(17) 0.0384(19) 0.0336(16) 0.0038(14) 0.0001(13) -0.0001(14) 
C21 0.0359(16) 0.0354(18) 0.0281(15) 0.0043(13) -0.0014(12) -0.0001(14) 
C22 0.0412(19) 0.048(2) 0.048(2) -0.0113(17) 0.0061(15) -0.0044(16) 
C23 0.043(2) 0.055(2) 0.055(2) -0.0117(19) 0.0102(17) 0.0015(17) 
C24 0.0350(17) 0.047(2) 0.0426(18) 0.0083(16) 0.0024(14) -0.0010(15) 
C25 0.043(2) 0.046(2) 0.054(2) -0.0068(18) -0.0079(16) -0.0002(16) 
C26 0.0391(19) 0.046(2) 0.049(2) -0.0107(17) -0.0010(15) 0.0063(16) 
C31 0.0373(17) 0.0314(17) 0.0286(15) 0.0026(13) 0.0020(12) -0.0004(13) 
C32 0.0390(18) 0.050(2) 0.0336(17) -0.0058(15) 0.0011(14) -0.0038(15) 
C33 0.045(2) 0.058(2) 0.0387(18) -0.0048(17) 0.0093(15) -0.0002(17) 
C34 0.0324(17) 0.047(2) 0.053(2) 0.0118(17) 0.0041(15) -0.0010(15) 
C35 0.0405(19) 0.052(2) 0.048(2) 0.0027(18) -0.0075(16) -0.0086(17) 
C36 0.0402(19) 0.050(2) 0.0349(17) -0.0036(15) 0.0005(14) -0.0063(16) 
C51 0.051(2) 0.039(2) 0.0366(17) 0.0000(15) 0.0041(15) -0.0013(16) 
C52 0.066(2) 0.035(2) 0.051(2) 0.0019(17) 0.0044(18) 0.0005(17) 
C53 0.070(3) 0.042(2) 0.047(2) 0.0106(17) 0.0005(18) 0.0028(19) 
C54 0.062(2) 0.042(2) 0.0354(18) 0.0073(16) 0.0033(16) -0.0011(17) 
C91 0.0437(18) 0.0373(18) 0.0314(16) -0.0020(14) 0.0022(14) 0.0003(15) 
C92 0.050(2) 0.091(3) 0.0338(18) 0.007(2) 0.0076(16) 0.012(2) 
C93 0.048(2) 0.086(3) 0.045(2) 0.010(2) 0.0036(17) 0.015(2) 
C94 0.0376(18) 0.044(2) 0.051(2) 0.0025(16) 0.0078(15) 0.0003(15) 
C95 0.049(2) 0.066(3) 0.0369(18) 0.0064(18) 0.0096(16) 0.0001(19) 
C96 0.0407(19) 0.059(2) 0.0365(18) 0.0030(16) 0.0028(14) 0.0026(17) 
C101 0.0420(18) 0.0346(18) 0.0338(16) -0.0033(14) 0.0035(14) -0.0042(14) 
C102 0.0458(19) 0.044(2) 0.0341(17) -0.0070(15) 0.0000(14) -0.0001(16) 
C103 0.049(2) 0.044(2) 0.0410(19) -0.0049(16) 0.0092(15) 0.0046(16) 
C104 0.0436(19) 0.0356(19) 0.0460(19) -0.0009(15) 0.0010(15) -0.0029(15) 
C105 0.051(2) 0.070(3) 0.0389(19) -0.0077(19) -0.0021(16) -0.008(2) 
C106 0.048(2) 0.067(3) 0.0371(18) -0.0123(18) 0.0073(15) -0.0058(19) 
C121 0.048(2) 0.0372(19) 0.0454(19) -0.0036(16) 0.0011(15) -0.0019(16) 
C122 0.055(2) 0.034(2) 0.068(3) 0.0025(18) 0.0022(19) -0.0066(17) 
C123 0.070(3) 0.043(2) 0.055(2) 0.0099(18) 0.004(2) -0.0106(19) 
C124 0.056(2) 0.045(2) 0.0427(19) 0.0089(16) 0.0016(16) -0.0063(17) 
C15 0.085(3) 0.063(3) 0.051(2) -0.001(2) 0.011(2) 0.004(2) 
Cl1 0.0859(8) 0.0715(8) 0.0795(8) -0.0181(6) 0.0225(6) -0.0122(6) 
Cl2 0.0727(7) 0.0660(7) 0.0598(6) 0.0018(5) 0.0042(5) -0.0047(5) 
C16 0.144(7) 0.158(8) 0.189(9) -0.078(7) 0.097(7) -0.041(6) 
Cl3 0.0936(11) 0.1683(19) 0.0955(11) -0.0351(11) 0.0156(9) -0.0150(11) 
Cl4 0.1253(13) 0.0923(11) 0.1057(11) -0.0039(9) 0.0189(10) 0.0010(10) 
 
_geom_special_details 
; 
 All esds (except the esd in the dihedral angle between two l.s. planes) 
 are estimated using the full covariance matrix.  The cell esds are taken 
 into account individually in the estimation of esds in distances, angles 
 and torsion angles; correlations between esds in cell parameters are only 
 used when they are defined by crystal symmetry.  An approximate (isotropic) 
 treatment of cell esds is used for estimating esds involving l.s. planes. 
; 
 
loop_ 
 _geom_bond_atom_site_label_1 
 _geom_bond_atom_site_label_2 
 _geom_bond_distance 
 _geom_bond_site_symmetry_2 
 _geom_bond_publ_flag 
Br1 C24 1.901(3) . ? 
Br2 C34 1.897(3) . ? 
Br3 C104 1.907(4) . ? 
Br4 C94 1.905(4) . ? 
N1 C14 1.273(4) . ? 
N1 C2 1.463(4) . ? 
C2 C21 1.524(4) . ? 
C2 C3 1.544(4) . ? 
C2 H2 0.9900 . ? 
C3 N4 1.455(4) . ? 
C3 C31 1.518(4) . ? 
C3 H3 0.9900 . ? 
N4 C5 1.371(4) . ? 
N4 H4 0.83(4) . ? 
C5 C51 1.398(5) . ? 
C5 C6 1.428(4) . ? 
C6 C54 1.389(5) . ? 
C6 C7 1.461(5) . ? 
C7 N8 1.276(4) . ? 
C7 H7 0.9400 . ? 
N8 C9 1.469(4) . ? 
C9 C91 1.521(5) . ? 
C9 C10 1.548(5) . ? 
C9 H9 0.9900 . ? 
C10 N11 1.453(4) . ? 
C10 C101 1.531(5) . ? 
C10 H10 0.9900 . ? 
N11 C12 1.367(4) . ? 
N11 H11 0.78(4) . ? 
C12 C121 1.406(5) . ? 
C12 C13 1.419(5) . ? 
C13 C124 1.392(5) . ? 
C13 C14 1.457(5) . ? 
C14 H14 0.9400 . ? 
C21 C22 1.377(5) . ? 
C21 C26 1.388(5) . ? 
C22 C23 1.392(5) . ? 
C22 H22 0.9400 . ? 
C23 C24 1.373(5) . ? 
C23 H23 0.9400 . ? 
C24 C25 1.375(5) . ? 
C25 C26 1.378(5) . ? 
C25 H25 0.9400 . ? 
C26 H26 0.9400 . ? 
C31 C32 1.390(5) . ? 
C31 C36 1.391(5) . ? 
C32 C33 1.375(5) . ? 
C32 H32 0.9400 . ? 
C33 C34 1.382(5) . ? 
C33 H33 0.9400 . ? 
C34 C35 1.370(5) . ? 
C35 C36 1.384(5) . ? 
C35 H35 0.9400 . ? 
C36 H36 0.9400 . ? 
C51 C52 1.383(5) . ? 
C51 H51 0.9400 . ? 
C52 C53 1.384(5) . ? 
C52 H52 0.9400 . ? 
C53 C54 1.371(5) . ? 
C53 H53 0.9400 . ? 
C54 H54 0.9400 . ? 
C91 C96 1.383(5) . ? 
C91 C92 1.385(5) . ? 
C92 C93 1.385(5) . ? 
C92 H92 0.9400 . ? 
C93 C94 1.374(5) . ? 
C93 H93 0.9400 . ? 
C94 C95 1.367(5) . ? 
C95 C96 1.383(5) . ? 
C95 H95 0.9400 . ? 
C96 H96 0.9400 . ? 
C101 C102 1.382(5) . ? 
C101 C106 1.388(5) . ? 
C102 C103 1.388(5) . ? 
C102 H102 0.9400 . ? 
C103 C104 1.372(5) . ? 
C103 H103 0.9400 . ? 
C104 C105 1.376(5) . ? 
C105 C106 1.383(5) . ? 
C105 H105 0.9400 . ? 
C106 H106 0.9400 . ? 
C121 C122 1.374(5) . ? 
C121 H121 0.9400 . ? 
C122 C123 1.386(6) . ? 
C122 H122 0.9400 . ? 
C123 C124 1.375(5) . ? 
C123 H123 0.9400 . ? 
C124 H124 0.9400 . ? 
C15 Cl1 1.747(5) . ? 
C15 Cl2 1.759(5) . ? 
C15 H15A 0.9800 . ? 
C15 H15B 0.9800 . ? 
C16 Cl3 1.696(8) . ? 
C16 Cl4 1.708(8) . ? 
C16 H16A 0.9800 . ? 
C16 H16B 0.9800 . ? 
 
loop_ 
 _geom_angle_atom_site_label_1 
 _geom_angle_atom_site_label_2 
 _geom_angle_atom_site_label_3 
 _geom_angle 
 _geom_angle_site_symmetry_1 
 _geom_angle_site_symmetry_3 
 _geom_angle_publ_flag 
C14 N1 C2 117.8(3) . . ? 
N1 C2 C21 111.1(3) . . ? 
N1 C2 C3 108.5(2) . . ? 
C21 C2 C3 112.0(3) . . ? 
N1 C2 H2 108.4 . . ? 
C21 C2 H2 108.4 . . ? 
C3 C2 H2 108.4 . . ? 
N4 C3 C31 113.6(3) . . ? 
N4 C3 C2 108.2(3) . . ? 
C31 C3 C2 110.0(3) . . ? 
N4 C3 H3 108.3 . . ? 
C31 C3 H3 108.3 . . ? 
C2 C3 H3 108.3 . . ? 
C5 N4 C3 122.4(3) . . ? 
C5 N4 H4 116(3) . . ? 
C3 N4 H4 115(3) . . ? 
N4 C5 C51 122.2(3) . . ? 
N4 C5 C6 120.0(3) . . ? 
C51 C5 C6 117.8(3) . . ? 
C54 C6 C5 119.0(3) . . ? 
C54 C6 C7 117.4(3) . . ? 
C5 C6 C7 123.6(3) . . ? 
N8 C7 C6 125.4(3) . . ? 
N8 C7 H7 117.3 . . ? 
C6 C7 H7 117.3 . . ? 
C7 N8 C9 117.4(3) . . ? 
N8 C9 C91 108.5(3) . . ? 
N8 C9 C10 109.8(3) . . ? 
C91 C9 C10 115.2(3) . . ? 
N8 C9 H9 107.7 . . ? 
C91 C9 H9 107.7 . . ? 
C10 C9 H9 107.7 . . ? 
N11 C10 C101 113.6(3) . . ? 
N11 C10 C9 109.4(3) . . ? 
C101 C10 C9 110.7(3) . . ? 
N11 C10 H10 107.7 . . ? 
C101 C10 H10 107.7 . . ? 
C9 C10 H10 107.7 . . ? 
C12 N11 C10 123.7(3) . . ? 
C12 N11 H11 116(3) . . ? 
C10 N11 H11 116(3) . . ? 
N11 C12 C121 122.5(3) . . ? 
N11 C12 C13 120.0(3) . . ? 
C121 C12 C13 117.5(3) . . ? 
C124 C13 C12 119.7(3) . . ? 
C124 C13 C14 116.9(3) . . ? 
C12 C13 C14 123.3(3) . . ? 
N1 C14 C13 126.0(3) . . ? 
N1 C14 H14 117.0 . . ? 
C13 C14 H14 117.0 . . ? 
C22 C21 C26 118.3(3) . . ? 
C22 C21 C2 122.5(3) . . ? 
C26 C21 C2 119.2(3) . . ? 
C21 C22 C23 121.0(3) . . ? 
C21 C22 H22 119.5 . . ? 
C23 C22 H22 119.5 . . ? 
C24 C23 C22 118.8(3) . . ? 
C24 C23 H23 120.6 . . ? 
C22 C23 H23 120.6 . . ? 
C23 C24 C25 121.6(3) . . ? 
C23 C24 Br1 119.0(3) . . ? 
C25 C24 Br1 119.4(3) . . ? 
C24 C25 C26 118.5(3) . . ? 
C24 C25 H25 120.7 . . ? 
C26 C25 H25 120.7 . . ? 
C25 C26 C21 121.6(3) . . ? 
C25 C26 H26 119.2 . . ? 
C21 C26 H26 119.2 . . ? 
C32 C31 C36 118.1(3) . . ? 
C32 C31 C3 119.4(3) . . ? 
C36 C31 C3 122.4(3) . . ? 
C33 C32 C31 121.6(3) . . ? 
C33 C32 H32 119.2 . . ? 
C31 C32 H32 119.2 . . ? 
C32 C33 C34 118.9(3) . . ? 
C32 C33 H33 120.6 . . ? 
C34 C33 H33 120.6 . . ? 
C35 C34 C33 121.1(3) . . ? 
C35 C34 Br2 119.6(3) . . ? 
C33 C34 Br2 119.3(3) . . ? 
C34 C35 C36 119.5(3) . . ? 
C34 C35 H35 120.2 . . ? 
C36 C35 H35 120.2 . . ? 
C35 C36 C31 120.8(3) . . ? 
C35 C36 H36 119.6 . . ? 
C31 C36 H36 119.6 . . ? 
C52 C51 C5 121.3(3) . . ? 
C52 C51 H51 119.3 . . ? 
C5 C51 H51 119.3 . . ? 
C51 C52 C53 120.6(4) . . ? 
C51 C52 H52 119.7 . . ? 
C53 C52 H52 119.7 . . ? 
C54 C53 C52 119.0(4) . . ? 
C54 C53 H53 120.5 . . ? 
C52 C53 H53 120.5 . . ? 
C53 C54 C6 122.3(3) . . ? 
C53 C54 H54 118.9 . . ? 
C6 C54 H54 118.9 . . ? 
C96 C91 C92 117.9(3) . . ? 
C96 C91 C9 118.4(3) . . ? 
C92 C91 C9 123.6(3) . . ? 
C91 C92 C93 121.5(3) . . ? 
C91 C92 H92 119.2 . . ? 
C93 C92 H92 119.2 . . ? 
C94 C93 C92 118.8(4) . . ? 
C94 C93 H93 120.6 . . ? 
C92 C93 H93 120.6 . . ? 
C95 C94 C93 121.1(3) . . ? 
C95 C94 Br4 118.6(3) . . ? 
C93 C94 Br4 120.3(3) . . ? 
C94 C95 C96 119.4(3) . . ? 
C94 C95 H95 120.3 . . ? 
C96 C95 H95 120.3 . . ? 
C91 C96 C95 121.2(3) . . ? 
C91 C96 H96 119.4 . . ? 
C95 C96 H96 119.4 . . ? 
C102 C101 C106 118.1(3) . . ? 
C102 C101 C10 122.4(3) . . ? 
C106 C101 C10 119.5(3) . . ? 
C101 C102 C103 121.2(3) . . ? 
C101 C102 H102 119.4 . . ? 
C103 C102 H102 119.4 . . ? 
C104 C103 C102 118.9(3) . . ? 
C104 C103 H103 120.5 . . ? 
C102 C103 H103 120.5 . . ? 
C103 C104 C105 121.5(3) . . ? 
C103 C104 Br3 119.1(3) . . ? 
C105 C104 Br3 119.4(3) . . ? 
C104 C105 C106 118.6(3) . . ? 
C104 C105 H105 120.7 . . ? 
C106 C105 H105 120.7 . . ? 
C105 C106 C101 121.6(3) . . ? 
C105 C106 H106 119.2 . . ? 
C101 C106 H106 119.2 . . ? 
C122 C121 C12 121.0(3) . . ? 
C122 C121 H121 119.5 . . ? 
C12 C121 H121 119.5 . . ? 
C121 C122 C123 121.5(4) . . ? 
C121 C122 H122 119.3 . . ? 
C123 C122 H122 119.3 . . ? 
C124 C123 C122 118.5(4) . . ? 
C124 C123 H123 120.7 . . ? 
C122 C123 H123 120.7 . . ? 
C123 C124 C13 121.8(4) . . ? 
C123 C124 H124 119.1 . . ? 
C13 C124 H124 119.1 . . ? 
Cl1 C15 Cl2 112.4(2) . . ? 
Cl1 C15 H15A 109.1 . . ? 
Cl2 C15 H15A 109.1 . . ? 
Cl1 C15 H15B 109.1 . . ? 
Cl2 C15 H15B 109.1 . . ? 
H15A C15 H15B 107.9 . . ? 
Cl3 C16 Cl4 116.4(4) . . ? 
Cl3 C16 H16A 108.2 . . ? 
Cl4 C16 H16A 108.2 . . ? 
Cl3 C16 H16B 108.2 . . ? 
Cl4 C16 H16B 108.2 . . ? 
H16A C16 H16B 107.3 . . ? 
 
loop_ 
 _geom_torsion_atom_site_label_1 
 _geom_torsion_atom_site_label_2 
 _geom_torsion_atom_site_label_3 
 _geom_torsion_atom_site_label_4 
 _geom_torsion 
 _geom_torsion_site_symmetry_1 
 _geom_torsion_site_symmetry_2 
 _geom_torsion_site_symmetry_3 
 _geom_torsion_site_symmetry_4 
 _geom_torsion_publ_flag 
C14 N1 C2 C21 -109.0(3) . . . . ? 
C14 N1 C2 C3 127.5(3) . . . . ? 
N1 C2 C3 N4 53.4(3) . . . . ? 
C21 C2 C3 N4 -69.6(3) . . . . ? 
N1 C2 C3 C31 -71.2(3) . . . . ? 
C21 C2 C3 C31 165.8(2) . . . . ? 
C31 C3 N4 C5 -63.9(4) . . . . ? 
C2 C3 N4 C5 173.6(3) . . . . ? 
C3 N4 C5 C51 -27.1(5) . . . . ? 
C3 N4 C5 C6 153.6(3) . . . . ? 
N4 C5 C6 C54 177.4(3) . . . . ? 
C51 C5 C6 C54 -2.1(5) . . . . ? 
N4 C5 C6 C7 -5.4(5) . . . . ? 
C51 C5 C6 C7 175.1(3) . . . . ? 
C54 C6 C7 N8 -178.0(3) . . . . ? 
C5 C6 C7 N8 4.8(5) . . . . ? 
C6 C7 N8 C9 178.7(3) . . . . ? 
C7 N8 C9 C91 -102.3(3) . . . . ? 
C7 N8 C9 C10 131.0(3) . . . . ? 
N8 C9 C10 N11 45.2(4) . . . . ? 
C91 C9 C10 N11 -77.6(3) . . . . ? 
N8 C9 C10 C101 -80.6(3) . . . . ? 
C91 C9 C10 C101 156.5(3) . . . . ? 
C101 C10 N11 C12 -62.0(4) . . . . ? 
C9 C10 N11 C12 173.8(3) . . . . ? 
C10 N11 C12 C121 -16.4(5) . . . . ? 
C10 N11 C12 C13 163.7(3) . . . . ? 
N11 C12 C13 C124 178.1(3) . . . . ? 
C121 C12 C13 C124 -1.9(5) . . . . ? 
N11 C12 C13 C14 -4.5(5) . . . . ? 
C121 C12 C13 C14 175.6(3) . . . . ? 
C2 N1 C14 C13 -178.1(3) . . . . ? 
C124 C13 C14 N1 -176.6(3) . . . . ? 
C12 C13 C14 N1 5.9(5) . . . . ? 
N1 C2 C21 C22 -2.3(4) . . . . ? 
C3 C2 C21 C22 119.2(3) . . . . ? 
N1 C2 C21 C26 176.0(3) . . . . ? 
C3 C2 C21 C26 -62.5(4) . . . . ? 
C26 C21 C22 C23 0.8(5) . . . . ? 
C2 C21 C22 C23 179.1(3) . . . . ? 
C21 C22 C23 C24 1.0(6) . . . . ? 
C22 C23 C24 C25 -1.4(6) . . . . ? 
C22 C23 C24 Br1 177.9(3) . . . . ? 
C23 C24 C25 C26 0.0(6) . . . . ? 
Br1 C24 C25 C26 -179.2(3) . . . . ? 
C24 C25 C26 C21 1.8(6) . . . . ? 
C22 C21 C26 C25 -2.2(5) . . . . ? 
C2 C21 C26 C25 179.4(3) . . . . ? 
N4 C3 C31 C32 162.3(3) . . . . ? 
C2 C3 C31 C32 -76.2(4) . . . . ? 
N4 C3 C31 C36 -20.8(5) . . . . ? 
C2 C3 C31 C36 100.7(4) . . . . ? 
C36 C31 C32 C33 -0.8(5) . . . . ? 
C3 C31 C32 C33 176.3(3) . . . . ? 
C31 C32 C33 C34 -0.3(6) . . . . ? 
C32 C33 C34 C35 1.4(6) . . . . ? 
C32 C33 C34 Br2 -177.4(3) . . . . ? 
C33 C34 C35 C36 -1.4(6) . . . . ? 
Br2 C34 C35 C36 177.4(3) . . . . ? 
C34 C35 C36 C31 0.3(6) . . . . ? 
C32 C31 C36 C35 0.7(5) . . . . ? 
C3 C31 C36 C35 -176.2(3) . . . . ? 
N4 C5 C51 C52 -176.8(3) . . . . ? 
C6 C5 C51 C52 2.6(5) . . . . ? 
C5 C51 C52 C53 -1.5(6) . . . . ? 
C51 C52 C53 C54 -0.3(6) . . . . ? 
C52 C53 C54 C6 0.8(6) . . . . ? 
C5 C6 C54 C53 0.4(6) . . . . ? 
C7 C6 C54 C53 -177.0(4) . . . . ? 
N8 C9 C91 C96 109.1(4) . . . . ? 
C10 C9 C91 C96 -127.3(3) . . . . ? 
N8 C9 C91 C92 -67.4(5) . . . . ? 
C10 C9 C91 C92 56.2(5) . . . . ? 
C96 C91 C92 C93 -1.1(7) . . . . ? 
C9 C91 C92 C93 175.4(4) . . . . ? 
C91 C92 C93 C94 0.4(7) . . . . ? 
C92 C93 C94 C95 0.4(7) . . . . ? 
C92 C93 C94 Br4 -178.3(4) . . . . ? 
C93 C94 C95 C96 -0.6(6) . . . . ? 
Br4 C94 C95 C96 178.2(3) . . . . ? 
C92 C91 C96 C95 1.0(6) . . . . ? 
C9 C91 C96 C95 -175.7(4) . . . . ? 
C94 C95 C96 C91 -0.2(6) . . . . ? 
N11 C10 C101 C102 -15.1(5) . . . . ? 
C9 C10 C101 C102 108.4(4) . . . . ? 
N11 C10 C101 C106 164.6(3) . . . . ? 
C9 C10 C101 C106 -71.9(4) . . . . ? 
C106 C101 C102 C103 0.1(6) . . . . ? 
C10 C101 C102 C103 179.8(3) . . . . ? 
C101 C102 C103 C104 0.7(6) . . . . ? 
C102 C103 C104 C105 -0.9(6) . . . . ? 
C102 C103 C104 Br3 179.5(3) . . . . ? 
C103 C104 C105 C106 0.2(6) . . . . ? 
Br3 C104 C105 C106 179.8(3) . . . . ? 
C104 C105 C106 C101 0.6(6) . . . . ? 
C102 C101 C106 C105 -0.7(6) . . . . ? 
C10 C101 C106 C105 179.5(4) . . . . ? 
N11 C12 C121 C122 -177.6(3) . . . . ? 
C13 C12 C121 C122 2.3(5) . . . . ? 
C12 C121 C122 C123 -1.0(6) . . . . ? 
C121 C122 C123 C124 -0.7(6) . . . . ? 
C122 C123 C124 C13 1.1(6) . . . . ? 
C12 C13 C124 C123 0.2(6) . . . . ? 
C14 C13 C124 C123 -177.4(4) . . . . ? 
 
_diffrn_measured_fraction_theta_max    0.976 
_diffrn_reflns_theta_full              67.30 
_diffrn_measured_fraction_theta_full   0.976 
_refine_diff_density_max    1.110 
_refine_diff_density_min   -0.633 
_refine_diff_density_rms    0.066 
